# Supplementary material for: One-step green synthesis of a polypyrrole–Au nanocomposite and its application in myoglobin aptasensor
Source: Royal Society of Chemistry journal article supplement (doi:10.1039/c5ay01006c), 2015-01-01
Supplement: c5ay01006c1.pdf [file c5ay01006c1.pdf]

## Supporting Information

### One-step green synthesis of polypyrrole-Au nanocomposite and its application in myoglobin aptasensor

Chong Sun<sup>a</sup>, Daoying Wang<sup>a,\*</sup>, Zhiming Geng<sup>a</sup>, Ling Gao<sup>b</sup>, Muhan Zhang<sup>a</sup>, Huan Bian<sup>a</sup>, Fang Liu<sup>a</sup>,  
Yongzhi Zhu<sup>a</sup>, Haihong Wu<sup>a</sup>, Weimin Xu<sup>a,\*</sup>

<sup>a</sup>*Institute of Agricultural Products Processing, Jiangsu Academy of Agricultural Sciences, Nanjing 210014, China*

<sup>b</sup>*Jiangsu Collaborative Innovation Center of Biomedical Functional Materials, College of Chemistry and Materials Science, Nanjing Normal University, Nanjing 210023, China*

\*Corresponding author.

E-mail address: daoyingwang@yahoo.com (D. Wang); weiminxu2002@aliyun.com (W. Xu)

Tel.: +86 25 84390065, Fax: +86 25 84390065

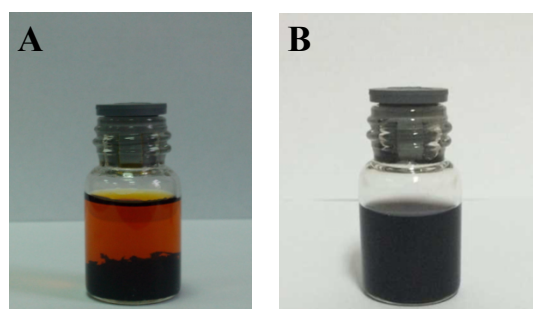

**Fig. S1** Photograph of (A) PPy and (B) PPy-Au NC.

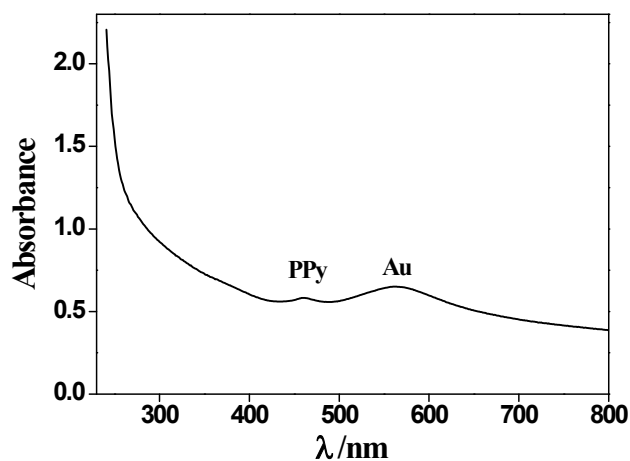

**Fig. S2** UV-*vis* adsorption spectrum of PPy-Au NC.

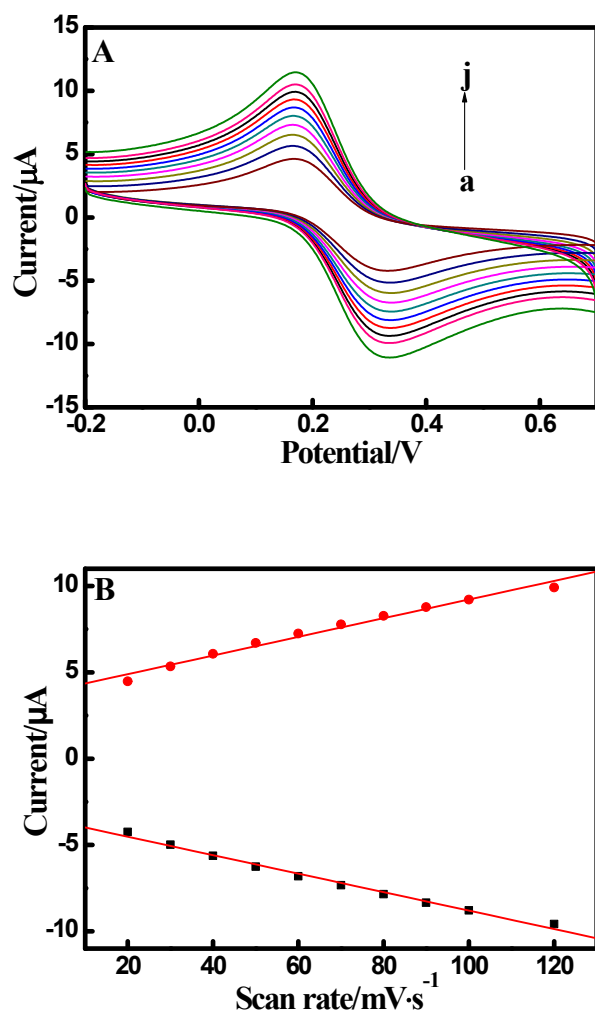

**Fig. S3** (A) CVs of MBA/(PPy-Au)/APTES/GCE in 0.1 M PBS (pH=6.0) containing 10 mM  $[\text{Fe}(\text{CN})_6]^{3-/4-}$  (1:1) solution and 0.1 M KCl at different scan rates. Scan rate (from a to j): 20, 30, 40, 50, 60, 70, 80, 90, 100, 120  $\text{mV}\cdot\text{s}^{-1}$ . (B) Plots of anodic and cathodic peak current vs. scan rate.

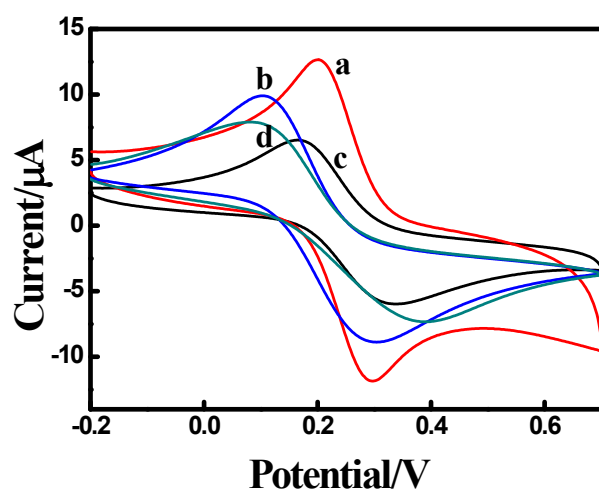

**Fig. S4** (A) CVs of (a) MBA/(PPy-Au)/APTES/GCE, (b) MBA/Au/APTES/GCE, (c) Mb/MBA/(PPy-Au)/APTES/GCE and (d) Mb/MBA/Au/APTES/GCE in 0.1 M PBS (pH = 6.0) containing 10 mM  $[\text{Fe}(\text{CN})_6]^{3-/4-}$  (1:1) solution and 0.1 M KCl.

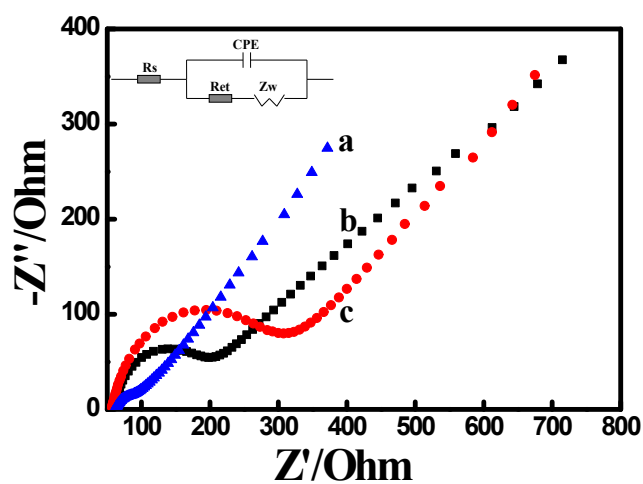

**Fig. S5** Electrochemical impedance spectra of (a) (PPy-Au)/APTES/GCE, (b) MBA/(PPy-Au)/APTES/GCE and (c) Mb/MBA/(PPy-Au)/APTES/GCE recorded at the open circuit potential in 10 mM  $[\text{Fe}(\text{CN})_6]^{3-/4-}$  (1:1) solution containing 0.1 M KCl. Inset is a schematic of the equivalent circuit.

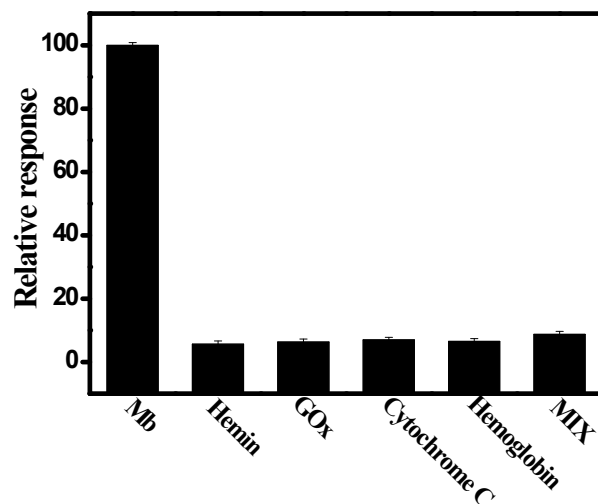

**Fig. S6** Specificity of the assay for  $0.05 \text{ g}\cdot\text{L}^{-1}$  Mb, four interfering substances and mixture of the four interferences, including hemin, GOx, cytochrome c and hemoglobin were  $5 \text{ g}\cdot\text{L}^{-1}$ .

**Table S1.** Comparison of analytical performance of aptasensor and other determination methods

| Determination methods                | Linear Range                                | Detection limit                       | R <sup>2</sup> | Ref.      |
|--------------------------------------|---------------------------------------------|---------------------------------------|----------------|-----------|
| poly(HEMA-MATrp) nanofilm SPR sensor | 0.1-1.0 $\mu\text{g}\cdot\text{mL}^{-1}$    | 87.6 $\text{ng}\cdot\text{mL}^{-1}$   | 0.98           | 45        |
| MIP/Au-SPE biosensor                 | 0.852-4.26 $\mu\text{g}\cdot\text{mL}^{-1}$ | 2.25 $\mu\text{g}\cdot\text{mL}^{-1}$ | /              | 46        |
| TiO <sub>2</sub> nanotubes sensor    | 0.001-0.1 $\text{mg}\cdot\text{mL}^{-1}$    | 1 $\mu\text{g}\cdot\text{mL}^{-1}$    | /              | 47        |
| SPR immunosensor                     | 100-1700 $\text{ng}\cdot\text{mL}^{-1}$     | /                                     | >0.98          | 48        |
| MBA/(PPy-Au)/APTES/GCE               | 0.0001- 0.15 $\text{g}\cdot\text{L}^{-1}$   | 30.9 $\text{ng}\cdot\text{mL}^{-1}$   | 0.9931         | This work |

/ represents relevant data which were not provided in these references.

**Table S2.** Comparison of two methods obtained in practical samples.

| Samples                                           | muscle-1        | muscle-2        | muscle-3        | muscle-4        |
|---------------------------------------------------|-----------------|-----------------|-----------------|-----------------|
| Colorimetry ( $\mu\text{mol}\cdot\text{g}^{-1}$ ) | 1.59 $\pm$ 0.18 | 1.40 $\pm$ 0.25 | 0.25 $\pm$ 0.31 | 2.12 $\pm$ 0.41 |
| Aptasensors ( $\mu\text{mol}\cdot\text{g}^{-1}$ ) | 1.48 $\pm$ 0.02 | 1.05 $\pm$ 0.08 | 0.17 $\pm$ 0.05 | 1.75 $\pm$ 0.03 |
